# Supplementary material
Source: Springer Nature journal article supplement (https://www.springermedizin.de/resource/supplementary/12943_2010_720_MOESM1_ESM.pdf/9554654)

**A.**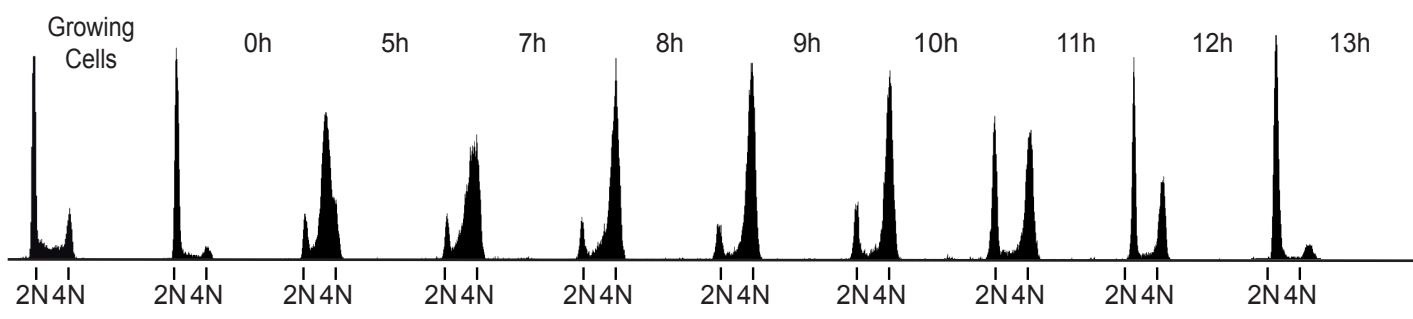**B.**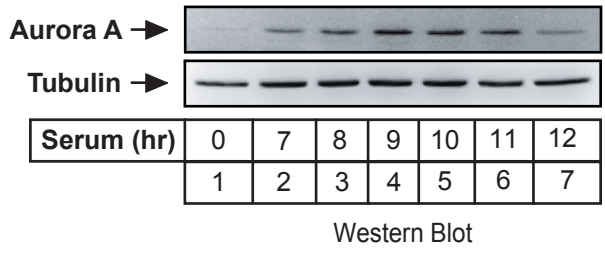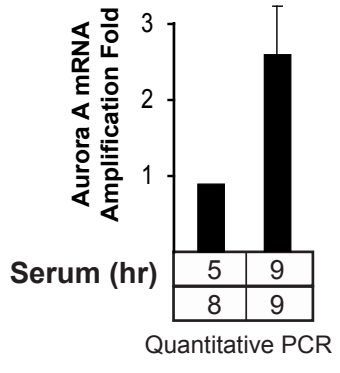**C.**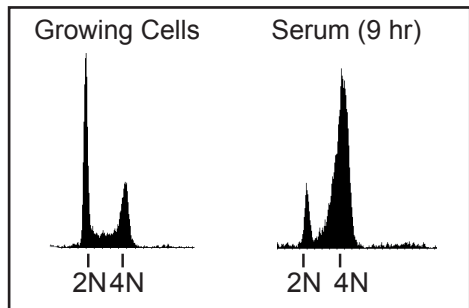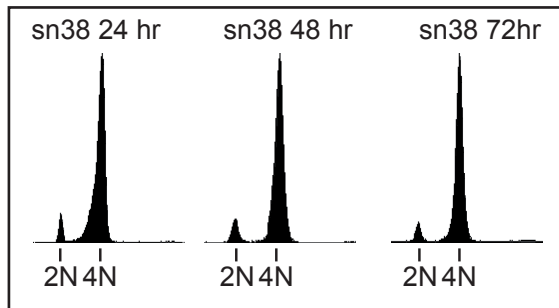**D.**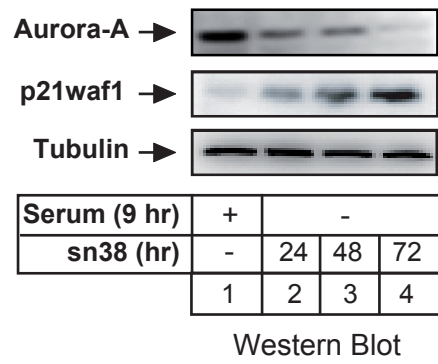**E.**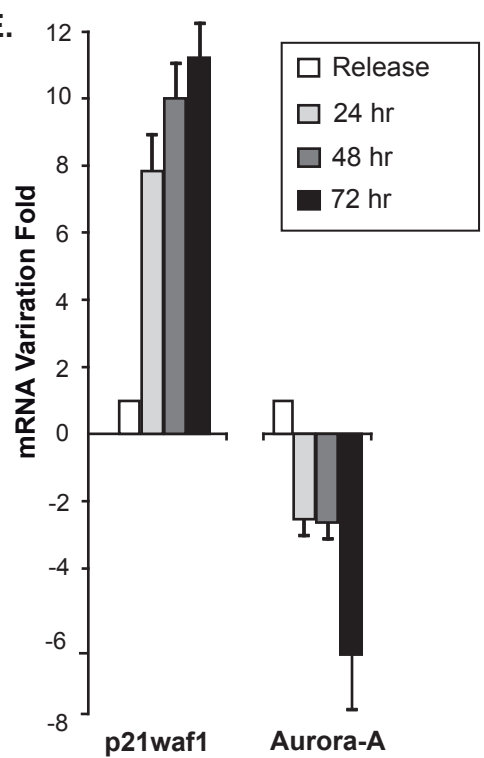

Supplement: MOESM1 [file 9554654]
